# Supplementary material for: Characteristics, laboratories, and prognosis of severe COVID-19 in the Tokyo metropolitan area: A retrospective case series
Source: PLoS One. 2020 Sep 24;15(9):e0239644. doi: 10.1371/journal.pone.0239644 (PMC7514085; doi:10.1371/journal.pone.0239644)
Supplement: S1 Table — BMI: body mass index; GERD: gastroesophageal reflux disease; CKD: chronic kidney disease; CHF: congestive heart failure; DM: diabetes mellitus; DVT: deep venous thrombosis; CS: ciclesonide; FV: favipiravir; XR: Xarelto (rivaroxaban); Hep: heparin; mPSL: methylprednisolone; N/A: not available. (XLSX) [file pone.0239644.s001.xlsx]

## Sheet: Sheet1
Age	Sex (M1F2)	fever	sore throat	dyspnea	cough	taste disturbance	malaise	comorbidities	smoke	complications	BMI	treatment	mechanical ventilation	recovery	total admission days
52	1	1	0	0	0	0	1	bronchial asthma	0		21.04	CS	0	1	4
34	2	1	0	0	1	1	0		0		21.76	CS	0	1	3
69	1	1	0	0	0	0	1	hypertension, GERD	1		24.22	CS	0	1	18
77	2	1	0	0	1	1	0	bronchial asthma	1		28.31	CS	0	1	41
30	2	0	1	0	0	1	0		0		19.38	CS	0	1	4
43	1	1	0	0	0	1	1		1		23.39	CS	0	1	5
90	1	1	0	1	0	0	0	bronchial asthma, pleuritis, CKD, hypertension, CHF	1		N/A		0	1	6
52	1	1	0	0	1	0	0	hypertension, GERD	1		23.11	CS	0	1	5
47	2	0	0	0	1	1	0		0		21.1	CS	0	1	7
70	2	1	0	0	1	0	0	bronchial asthma	N/A		N/A	CS	0	1	13
21	1	1	1	0	0	1	0		0		26.12	CS	0	1	7
25	2	1	0	1	1	1	0	bronchial asthma	1		18.07	CS	0	1	5
72	1	1	0	0	0	0	0	hypertension, atrial fibrillation	0		24.77	CS	0	1	31
89	1	1	0	0	0	0	0	atrial fibrillation, CHF	1		15	CS	0	1	22
93	1	1	0	0	0	0	0	hypertension	1		22.58	CS	0	1	28
83	1	1	0	0	0	0	0	CKD, hypertension	1		N/A	CS, FV, mPSL	0	1	awaiting discharge
83	2	1	0	0	0	0	0	CHF	N/A		N/A	CS	0	1	16
82	2	1	0	0	0	0	0	rheumatoid arthritis, hypertension	0		16.95	CS, FV	0	1	awaiting discharge
92	2	1	0	0	0	0	0	colon cancer	0		N/A	CS, FV	0	1	37
57	1	1	1	1	0	0	1	pleuritis	1		20.91	CS, FV	0	1	22
67	1	0	0	1	0	1	1		1	pulmonary embolus, DVT	16.95	CS, FV, XR, Hep	0	1	5
45	1	1	0	0	0	0	0		1		20.8	CS, FV	0	1	8
85	2	1	0	1	0	0	0	CHF, atrial fibrillation, DM, CKD, malignant lymphoma	N/A		23.59	CS	0	1	30
